# Supplementary material for: Layered Na0.71CoO2: a powerful candidate for viable and high performance Na-batteries
Source: Royal Society of Chemistry journal article supplement (doi:10.1039/c2cp40699c), 2012-01-01
Supplement: c2cp40699c.pdf [file c2cp40699c.pdf]

**Supporting informations:**

# Layered $\text{Na}_{0.71}\text{CoO}_2$ : A powerful candidate for viable and high performance Na-batteries

*Massimiliano D'Arienzo<sup>a\*</sup>, Riccardo Ruffo<sup>a\*</sup>, Roberto Scotti<sup>a</sup>, Franca Morazzoni<sup>a</sup>,*

*Claudio Maria Mari<sup>a</sup>, Stefano Polizzi<sup>b</sup>*

<sup>a</sup>Department of Materials Science, University of Milano Bicocca, via R. Cozzi 53, I-20125 Milan,  
Italy

<sup>b</sup>Department of Physical Chemistry, University of Venezia, Via Torino 155/b, I-30172 Venezia,  
Italy

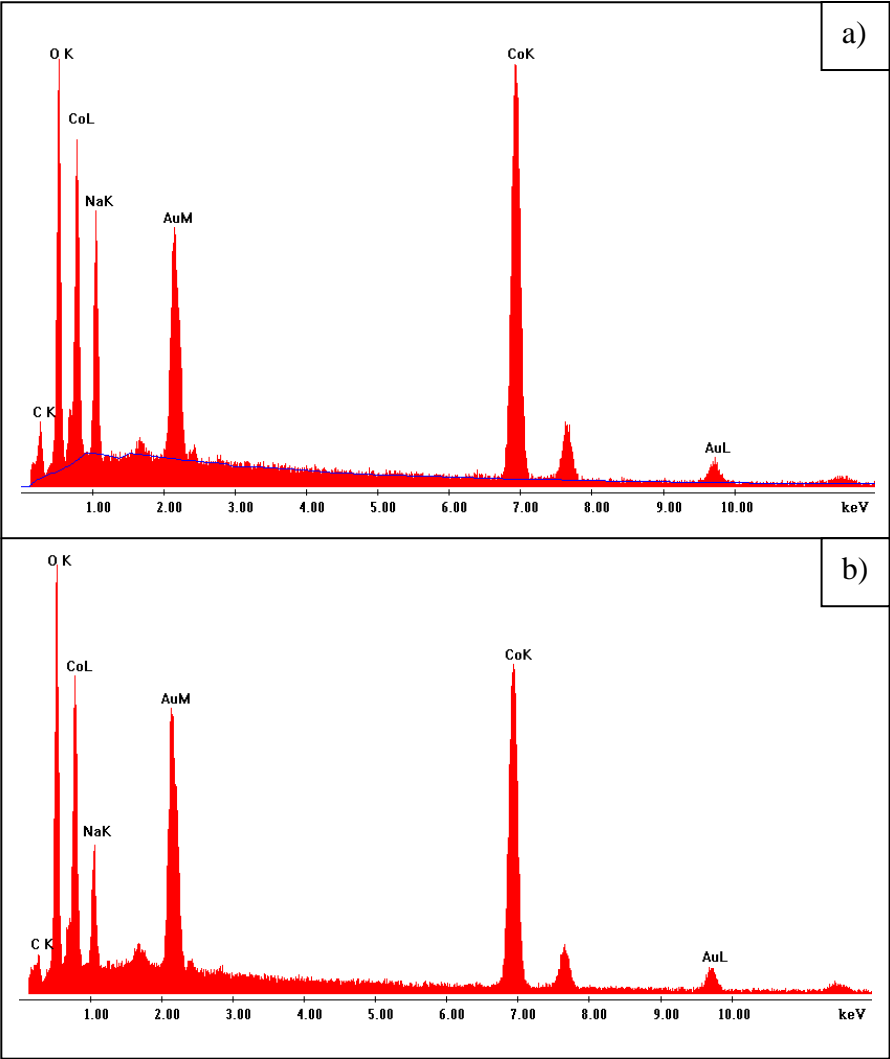

**Fig. S1:** EDX spectra of a) Na<sub>0.71</sub>CoO<sub>2</sub> (I) and Na<sub>0.71</sub>CoO<sub>2</sub> (II)
